# Supplementary material
Source: publisher figshare collection journal article supplement (https://brill.figshare.com/articles/dataset/_/18709058)
Supplement: Supplementary file 1 [file 1]

**A case of polygyny in the Bornean white-bearded gibbon (*Hylobates albibarbis*)**

Carolyn Thompson<sup>a,b,c,\*</sup>, Eka Cahyaningrum<sup>a</sup>, H          <sup>a</sup>, Abdul Aziz<sup>a,d</sup>,  
Susan M. Cheyne<sup>a,e</sup>

<sup>a</sup>The Borneo Nature Foundation (BNF), Jalan Bukit Raya, Palangka Raya, Central  
Kalimantan, 74874, Indonesia

<sup>b</sup>Genetics Evolution and Environment, University College London, Gower St, Bloomsbury,  
London WC1E 6BT, UK

<sup>c</sup>Institute of Zoology, Zoological Society of London, Regent's Park, London, NW1 4RY, UK

<sup>d</sup>Centre for International Cooperation in the Management of Tropical Peatlands (CIMTROP),  
University of Palangka Raya, Palangka Raya, Central Kalimantan, 74874, Indonesia

<sup>e</sup>Faculty of Humanities, Social Sciences and Law, Oxford Brookes University, Headington  
Road, Headington, Oxford, OX3 0BP, UK

\*Corresponding author; e-mail: carolyn.thompson.17@ucl.ac.uk

**Supplementary material**

**Video S1.** The two adult females singing the great call in unison recorded using Logic X Pro.
